# Supplementary figures and images for: Discovery of biomarkers for the presence and progression of left ventricular diastolic dysfunction and HEart faiLure with Preserved ejection Fraction in patients at risk for cardiovascular disease: rationale and design of the HELPFul case-cohort study in a Dutch cardiology outpatient clinic
Source: PubMed Central journal article supplement — BMJ Open. 2019 Jun 5;9(6):e028408. doi: 10.1136/bmjopen-2018-028408 (PMC6561429; doi:10.1136/bmjopen-2018-028408), 2019-06-05

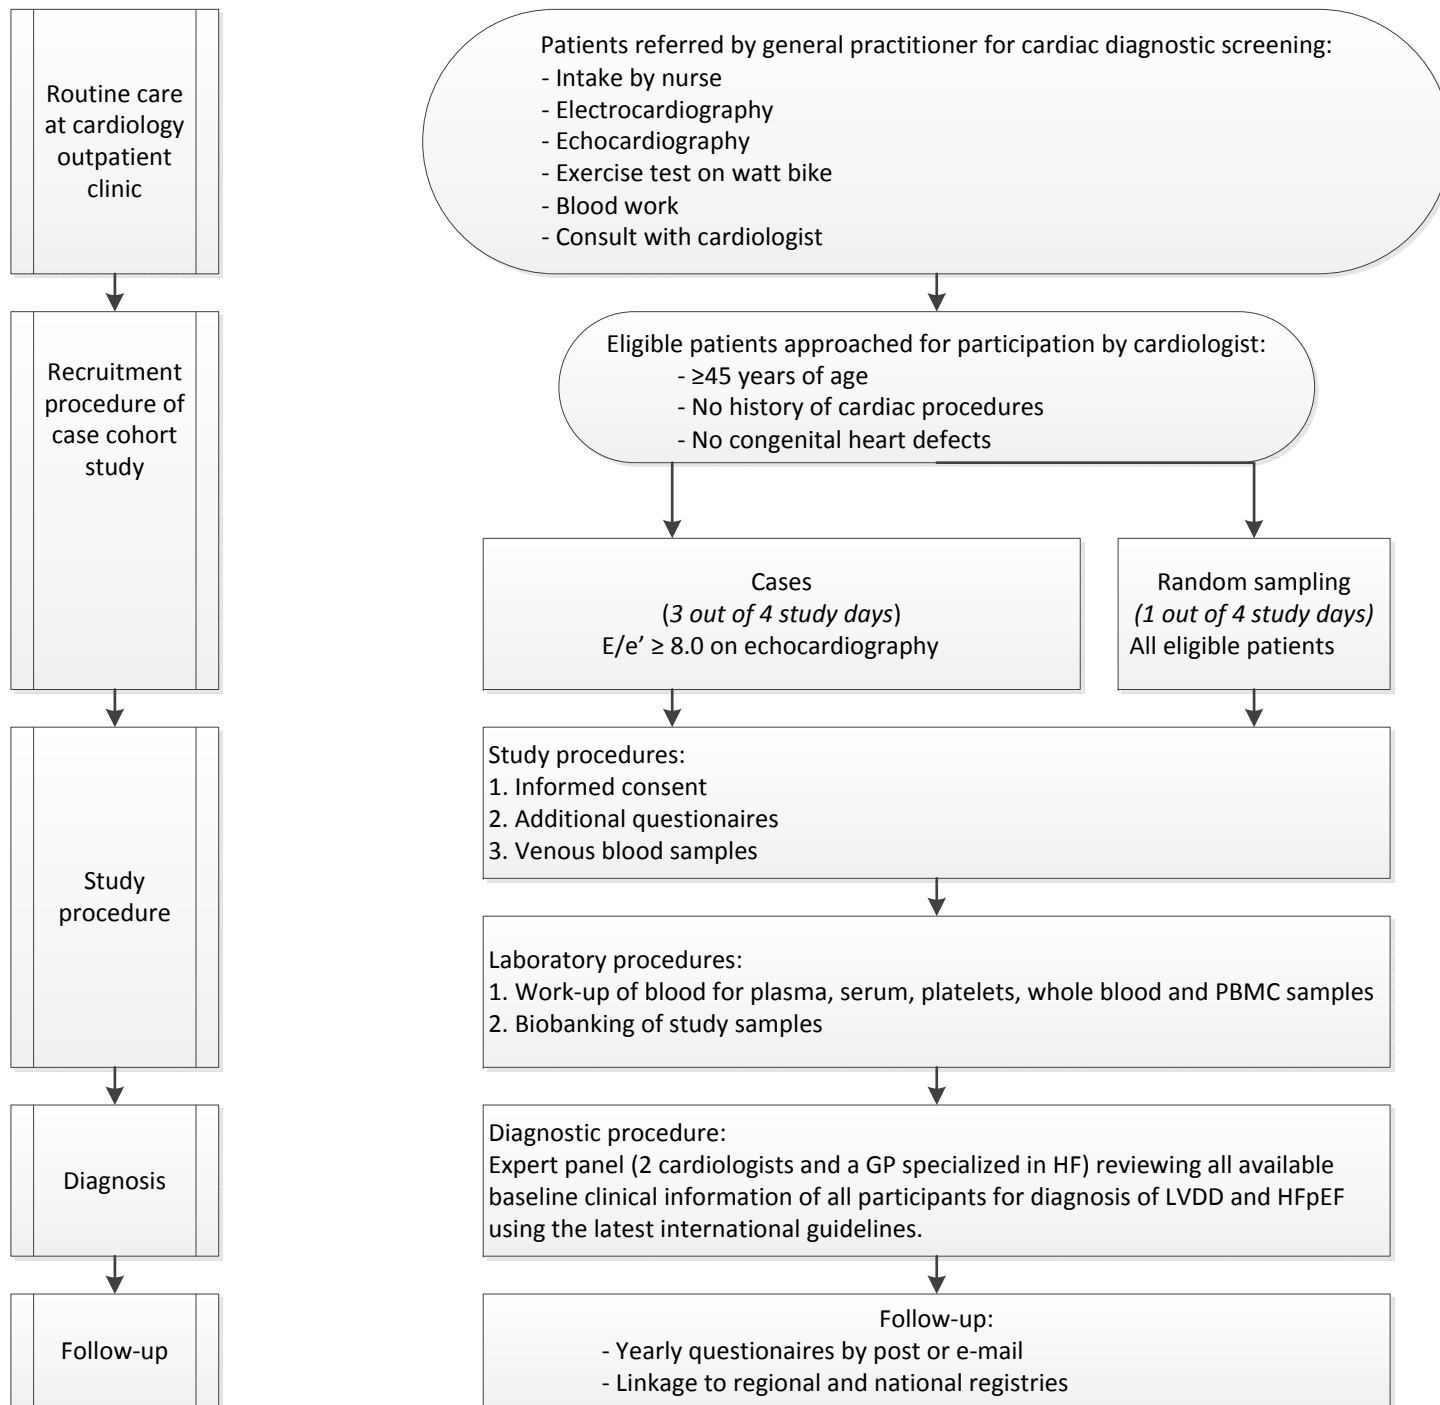

Supplement: bmjopen-2018-028408supp001.pdf [file bmjopen-2018-028408supp001.pdf]
